# Supplementary material for: Structure-dependent vibrational dynamics of Mg(BH4)2 polymorphs probed with neutron vibrational spectroscopy and first-principles calculations
Source: Royal Society of Chemistry journal article supplement (doi:10.1039/c6cp04469g), 2016-01-01
Supplement: c6cp04469g1.zip [file c6cp04469g1.zip]

**Supporting Information for:**

**Structure-dependent vibrational dynamics in Mg(BH4)2 polymorphs probed with neutron vibrational spectroscopy and first-principles calculations**

Mirjana Dimitrievska,1,2 James L. White,3 Wei Zhou,2 Vitalie Stavila,3 Leonard E. Klebanoff, 3 Terrence J. Udovic2

1National Renewable Energy Laboratory (NREL), 5013 Denver W Pkwy, Golden, CO 80401, United States

2NIST Center for Neutron Research, National Institute of Standards and Technology, Gaithersburg, MD 20899-6102, United States

3Sandia National Laboratories, California P.O. Box 969, Livermore, CA 94551-0969, United States

**How to view phonon animations using the V_Sim software***

The **alphaMg(BH4)2.xyz**, **gammaMg(BH4)2.xyz,** and **deltaMg(BH4)2.xyz** files contain the information needed to view the animated (gamma-point) phonon normal modes from the DFT-optimized 0 K α‑Mg(BH4)2, β-Mg(BH4)2, and δ-Mg(BH4)2 structures, respectively, following the steps below:

- Get the V_Sim software (It is free, and there is no need to install).
- Go to the following webpage and download the Win32 binaries:

<http://inac.cea.fr/L_Sim/V_Sim/download.html>

- Unzip the zip file to wherever you want to put the software.
- Click "~V_Sim\bin\V_sim.exe" to start the V_Sim program, then open the **alphaMg(BH4)2.xyz, gammaMg(BH4)2.xyz,** or **deltaMg(BH4)2.xyz** file to view the phonon animations.
- To build bonds in the structure, check the box on the left side of the "Pairs" button, and click the "Pairs" button.
- Highlight a pair and click the "Auto set" button to allow bonding.
- Adjust the "Link parameters," if desired.
- Adjust the element color, radius, etc. on the "Elements" tab, if desired.
- Go to the "Phonons" tab, highlight a phonon mode, and click the "Play" button to view a phonon animation. N.B. The mode energies are indicated in wavenumbers cm-1 (1 meV ≈ 8.066 cm-1).

* N.B., the use of this software does not imply its recommendation or endorsement by NIST
